# Supplementary material for: Autocatalytic amplified detection of DNA based on a CdSe quantum dot/folic acid electrochemiluminescence energy transfer system
Source: Royal Society of Chemistry journal article supplement (doi:10.1039/c4an01465k), 2014-08-29
Supplement: c4an01465k1.pdf [file c4an01465k1.pdf]

## Supporting Information

1  
2  
3  
4  
5  
6  
7  
8  
9  
10  
11  
12  
13  
14  
15  
16  
17  
18  
19  
20  
21  
22  
23  
24  
25  
26  
27

### Autocatalytic Amplified Detection of DNA Based on CdSe Quantum Dots/Folic Acid Electrochemiluminescence Energy Transfer System

Guifen Jie\*, Yingqiang Qin, Qingmin Meng, Jialin Wang\*

Key Laboratory of Sensor Analysis of Tumor Marker, Ministry of Education, College of Chemistry and Molecular Engineering, Qingdao University of Science and Technology, Qingdao 266042, P.R. China. E-mail: guifenjie @126.com; wangjialin5518@sina.com.

### Contents

|                                                                                                        |   |
|--------------------------------------------------------------------------------------------------------|---|
| 1 Table S1 .....                                                                                       | 2 |
| 2 Experimental Section.....                                                                            | 2 |
| 2.1. Materials and apparatus.....                                                                      | 2 |
| 2.2. Preparation of water-soluble quantum Dots.....                                                    | 3 |
| 2.3. DNAzyme-mediated amplified detection of DNA based on ECL quenching of CdSe QDs by folic acid..... | 3 |
| Figure S1 .....                                                                                        | 5 |
| Figure S2 .....                                                                                        | 6 |
| Figure S3 .....                                                                                        | 6 |

1

**Table S1. The Sequences of the DNA in Scheme 1**

| DNA                    | Sequence                                                                                   |
|------------------------|--------------------------------------------------------------------------------------------|
| Target DNA1:           | 5'- GGA CAG AGTCTC-3'                                                                      |
| DNA2 :                 | 5'- GAT ATC AGC GAT GAA GAC TC-3'                                                          |
| DNA3:                  | 5'- GAGA CTC TGT CCG AGT CTT CCA CCC ATG TTA<br>CTC T -3'                                  |
| DNA4:                  | 5'- NH <sub>2</sub> -GCT GGA CAG AGT ATrA GGA TAT CAA TTT<br>TTT TTT TTT AGT CCA GC-SH- 3' |
| single-base mismatched |                                                                                            |
| DNA1:                  | 5'- CGA CAG AGT-3'                                                                         |
| noncomplementary DNA1: | 5'- CCT GTC TCA-3'                                                                         |

2

**3 2. Experimental section**4 *2.1. Materials and apparatus*5 *2.1.1. Materials*

6 CdCl<sub>2</sub>·2.5H<sub>2</sub>O (98%), selenium (99.9%, powder), NaBH<sub>4</sub> (GR, 99.8%), mercaptoacetic acid  
7 (AR, 99.8%), folic acid (AR, 97%), MgCl<sub>2</sub> (AR, 98%), Tris (AR, 99%), K<sub>2</sub>S<sub>2</sub>O<sub>8</sub> (AR, 99.5%),  
8 KCl (AR, 99.98%) and EDTA (AR, 99.9%) were purchased from Aladdin Industrial  
9 Corporation, Multi-walled carbon nanotubes (CNTs, CVD method, purity >95%, diameter 30–60  
10 nm, length 0.5–15 μm) were purchased from Nanoport. Co. Ltd. (Shenzhen, China). Fifth-  
11 generation PAMAM dendrimers (ethylenediamine core, generation 5) were purchased as methanol  
12 solutions from Sigma-Aldrich (Shanghai) Trading Co., Ltd. All other reagents were of analytical  
13 grade. Double distilled water was used for all experiments. Phosphate buffer solutions (PBS, 0.1  
14 M) at various pH values were prepared by mixing different amounts of stock solutions of  
15 NaH<sub>2</sub>PO<sub>4</sub> and Na<sub>2</sub>HPO<sub>4</sub>. 1-Ethyl-3-(3-dimethylaminopropyl)-carbodiimide hydrochloride (EDC),  
16 and imidazole were obtained from Sigma. All of synthetic oligonucleotides were purchased from

1 Shanghai Sangon Biological Engineering Technology & Services Co., Ltd. (China). Sequences of  
2 the oligonucleotides are listed in Table S1.

### 3 2.1.2. Apparatus

4 Electrochemical and ECL measurements were carried out on a MPI-A ECL analyzer (Xi'An  
5 Remax Electronic Science & Technology, Xi'An, China) using a three-electrode system. The  
6 electrodes were an Au disk working electrode, a saturated calomel reference electrode, and a Pt  
7 counterelectrode. The spectral width of the photomultiplier tube (PMT) was 200–800 nm and the  
8 voltage of the PMT was 500–800V in the detection process. Transmission electron microscopy  
9 (TEM) images were recorded using a JEOL JSM-6700F instrument (Hitachi). Photoluminescence  
10 (PL) spectra were obtained on an RF-540 spectrophotometer (Shimadzu). Field-emission scanning  
11 electron microscopy (FE-SEM) was carried out on a JEOL JSM-6700F instrument.

### 12 2.2. Preparation of Water-Soluble Quantum Dots

13 Briefly, 0.05 g of selenium powder and 0.037 g of sodium borohydride were added to a small  
14 flask, then 4 mL of ultrapure water was added. The solution was degassed, refilled with nitrogen  
15 and heated to 80 °C. After the selenium powder disappeared completely, the resulting clear NaHSe  
16 of 0.1 M was obtained.

17 Colloidal CdSe-COOH nanocrystals were prepared as described with a slight modification.  
18 Briefly, freshly prepared 0.1 M NaHSe solution was added to 1.25 mM N<sub>2</sub>-saturated CdCl<sub>2</sub>  
19 solution, and the pH was adjusted to 11, then 200 μL of mercaptoacetic acid as the stabilizing  
20 agent was added. The molar ratio of Cd<sup>2+</sup>/ TGA /NaHSe was fixed at 1:2.4:0.5. After the mixture  
21 was vigorously stirred for 10 min, it was refluxed for 3 h to control the growth of the CdSe  
22 nanocrystals. The TGA-capped QDs were extracted by centrifugation at 6000 rpm, purified twice  
23 with ethanol, and finally dissolved into 10 mL water of pH 8. The water-soluble QDs were  
24 obtained.

### 25 2.3. DNAzyme-mediated Amplified detection of DNA based on ECL quenching of CdSe QDs by 26 folic acid

27 **Preparation of the hairpin DNA4- folic acid quencher probe.** Folic acid (4.4 mg, 10<sup>-5</sup> mol)  
28 was dissolved in 10 mL of ultrapure water, and diluted to 10<sup>-5</sup> mol·L<sup>-1</sup>. Then EDC (0.1 mol/L, 50

1  $\mu\text{L}$ ) and NHS (0.025 mol/L, 50  $\mu\text{L}$ ) were added to 500  $\mu\text{L}$  of the folic acid solution and incubated  
2 for 30 min. To form the quencher probe, 50  $\mu\text{L}$  of  $1.0 \times 10^{-5}$  M amine-modified hairpin DNA4 was  
3 added to 60  $\mu\text{L}$  of the activated folic acid solution, and reacted for 12 h at room temperature with  
4 gentle shaking.

5 **Preparation of the soluble PAMAM-CNTs.** Carbon nanotubes (CNTs) were chemically  
6 shortened by ultrasonic agitation in a mixture of sulfuric acid and nitric acid (3:1) for about 3 h.  
7 The resulting CNTs were separated and washed repeatedly with distilled water by centrifugation  
8 until pH was 7. 1 mL of PAMAM dendrimers aqueous solution (0.1 % wt) was firstly prepared,  
9 and then  $0.5 \text{ mg}\cdot\text{mL}^{-1}$  CNTs was dispersed in the PAMAM solution in the volume ratio of 1:1 , the  
10 resulting dispersion was sonicated for 30 min to give a homogeneous black suspension.  
11 Superfluous PAMAM was removed by centrifugation, the obtained PAMAM-CNTs was  
12 redispersed in water under gentle sonication.

13 **Preparation of the ECL Biosensor for detection of DNA.** The fabrication principle and  
14 procedure of the DNAzyme-mediated Amplified detection of DNA based on ECL quenching of  
15 CdSe QDs by folic acid are illustrated in Scheme 1. Briefly, gold disk electrodes (4 mm in  
16 diameter) were polished carefully with 1.0-, 0.3- and 0.05- $\mu\text{m}$   $\alpha\text{-Al}_2\text{O}_3$  powder on fine abrasive  
17 paper and washed ultrasonically with water. Before modification, the bare electrodes were  
18 scanned in 0.5 M  $\text{H}_2\text{SO}_4$  between  $-0.2$  and 1.5 V until a reproducible cyclic voltammogram was  
19 obtained. After the electrodes were thoroughly rinsed with deionized water and dried, 8  $\mu\text{L}$  of  
20 PAMAM-CNTs was dropped on the electrodes and dried. After the CdSe-COOH QDs were  
21 activated by EDC (0.1 M) and NHS (0.025 M) for 30 min, the electrodes were immersed in  
22 the QDs solution and reacted for 12 h at room temperature. Then the electrodes were rinsed with  
23 10 mM PBS buffer and performed the ECL measurement. Subsequently, 8  $\mu\text{L}$  of the hairpin  
24 DNA4-folic acid quencher probe was dropped on the electrode and reacted for 12 h at room  
25 temperature. As a result, the DNA4-folic acid quencher probe with thiol groups on the other end  
26 of DNA was conjugated to the CdSe-COOH QDs on the electrode via S-Cd bond. After the  
27 electrodes were rinsed with 0.01 M PBS buffer to remove nonspecifically adsorbed quencher  
28 probe and performed the ECL measurement, the electrodes were immersed in the mixture with

1 analyte DNA1, DNA2 ( $10^{-5}$  mol·L<sup>-1</sup>) and DNA3 ( $10^{-5}$  mol·L<sup>-1</sup>) in TE buffer (10 mmol·L<sup>-1</sup> Tris-  
2 HCl, 1 mmol·L<sup>-1</sup> EDTA and 12.5 mmol·L<sup>-1</sup> MgCl<sub>2</sub>), which was incubated at 37 °C for 2 h, and  
3 then washed twice for ECL measurements

4 **ECL Measurement.** The modified electrodes above were in contact with 0.1 M PBS (pH  
5 7.4) containing 0.1 M K<sub>2</sub>S<sub>2</sub>O<sub>8</sub> and 0.1 M KCl and scanned from 0 to -1.5 V. ECL signals related  
6 to the DNA concentrations were measured.

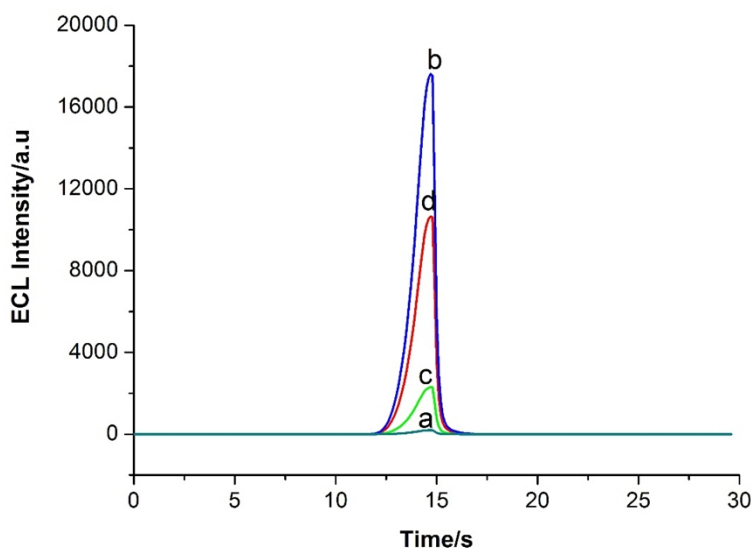

7  
8 **Figure S1** ECL-time curves for (a) bare electrode, (b) the PAMAM-CNT-QDs modified  
9 electrode, (c) ECL quenching by FA, (d) amplified detection of DNA in the presence of target  
10 DNA ( $10^{-6}$  mol·L<sup>-1</sup>) based on Mg<sup>2+</sup>-dependent DNAzyme autocatalytic system, 0.1 M PBS (pH  
11 =7.4) containing 0.1 mol·L<sup>-1</sup> KCl and 0.05 mol·L<sup>-1</sup> K<sub>2</sub>S<sub>2</sub>O<sub>8</sub>.

12 **Kinetics of Reaction.** The kinetic process of the DNAzyme-mediated amplified ECL  
13 detection of DNA was studied by monitoring the ECL change in the presence of target DNA.  
14 Following the immobilization of QDs, conjugation of the DNA4-folic acid quencher probe on the  
15 electrode, DNAzyme-mediated circular amplification, an increase in ECL intensity was observed.  
16 As shown in Figure S2, at the beginning, slow increase in ECL intensity was observed because the  
17 concentration of target DNA and released quencher probe was low. Subsequently, an immediate  
18 rise in ECL intensity was observed, signifying the formation of DNAzyme-mediated circular  
19 amplification after quick cleavage of hairpin substrate in the presence of Mg<sup>2+</sup> ions, and the  
20 release of quencher fragment as DNA triggers. After 60 min, the ECL intensity increased to a  
21 platform due to the depletion of the reaction components. These results further confirm that the

1 DNAzyme-mediated circular amplification occurred as expected and the detection of DNA can be  
2 accomplished within 2 h.

3

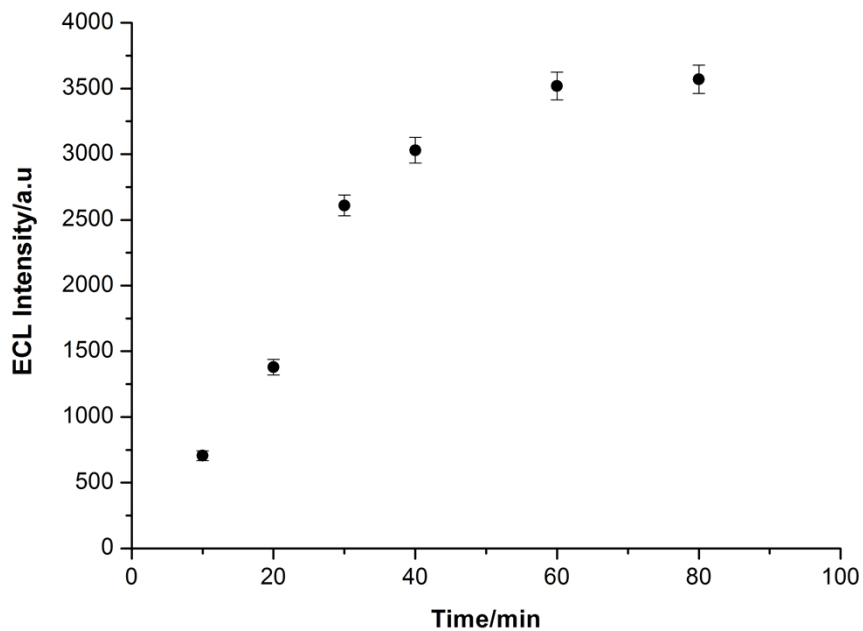

4

5 **Figure S2.** Kinetic response of the DNAzyme-mediated amplified ECL detection of DNA. Target  
6 DNA sequences ( $1.00 \text{ nmol}\cdot\text{L}^{-1}$ ). The error bar represents the standard deviation of three  
7 measurements.

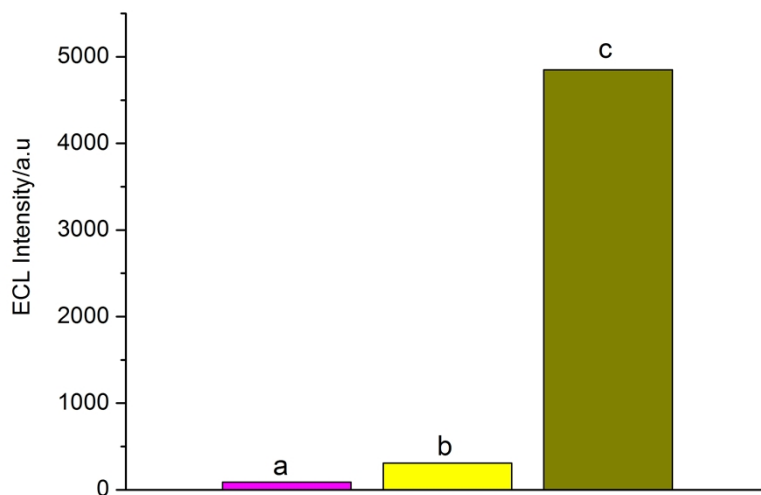

8

9 **Figure S3** ECL responses for different target DNA sequences ( $10.0 \text{ nmol}\cdot\text{L}^{-1}$ ). (a) completely  
10 mismatched DNA, (b) single-base mismatched DNA, (c) the complementary target DNA. The  
11 blank was deducted.

12
